# Supplementary material for: ParSE-seq: a calibrated multiplexed assay to facilitate the clinical classification of putative splice-altering variants
Source: PubMed Central journal article supplement — Nat Commun. 2024 Sep 27;15:8320. doi: 10.1038/s41467-024-52474-4 (PMC11437130; doi:10.1038/s41467-024-52474-4), 2024-09-27
Supplement: 41467_2024_52474_MOESM3_ESM.pdf [file 41467_2024_52474_MOESM3_ESM.pdf]

Supplementary Data 1.

Reagents, manufacturer, and catalogue numbers.

Supplementary Data 2.

Variant characteristics – genomic position, gnomAD allele frequency, ClinVar classification, and SpliceAI prediction.

Supplementary Data 3.

ParSE-seq functional iPSC-CM and HEK data for all studied variants.
